# Supplementary material for: Tumor Drug Concentration and Phosphoproteomic Profiles After Two Weeks of Treatment With Sunitinib in Patients with Newly Diagnosed Glioblastoma
Source: PubMed Central journal article supplement — Clin Cancer Res. 2022 Feb 11;28(8):1595–602. doi: 10.1158/1078-0432.CCR-21-1933 (PMC9365363; doi:10.1158/1078-0432.ccr-21-1933), 2022-02-11
Supplement: ccr-21-1933_supplementary_data_suppfigs2.pdf [file ccr-21-1933_supplementary_data_suppfigs2.pdf]

**Supplementary Figure 2 Unsupervised clustering of the tyrosine phosphoproteome**

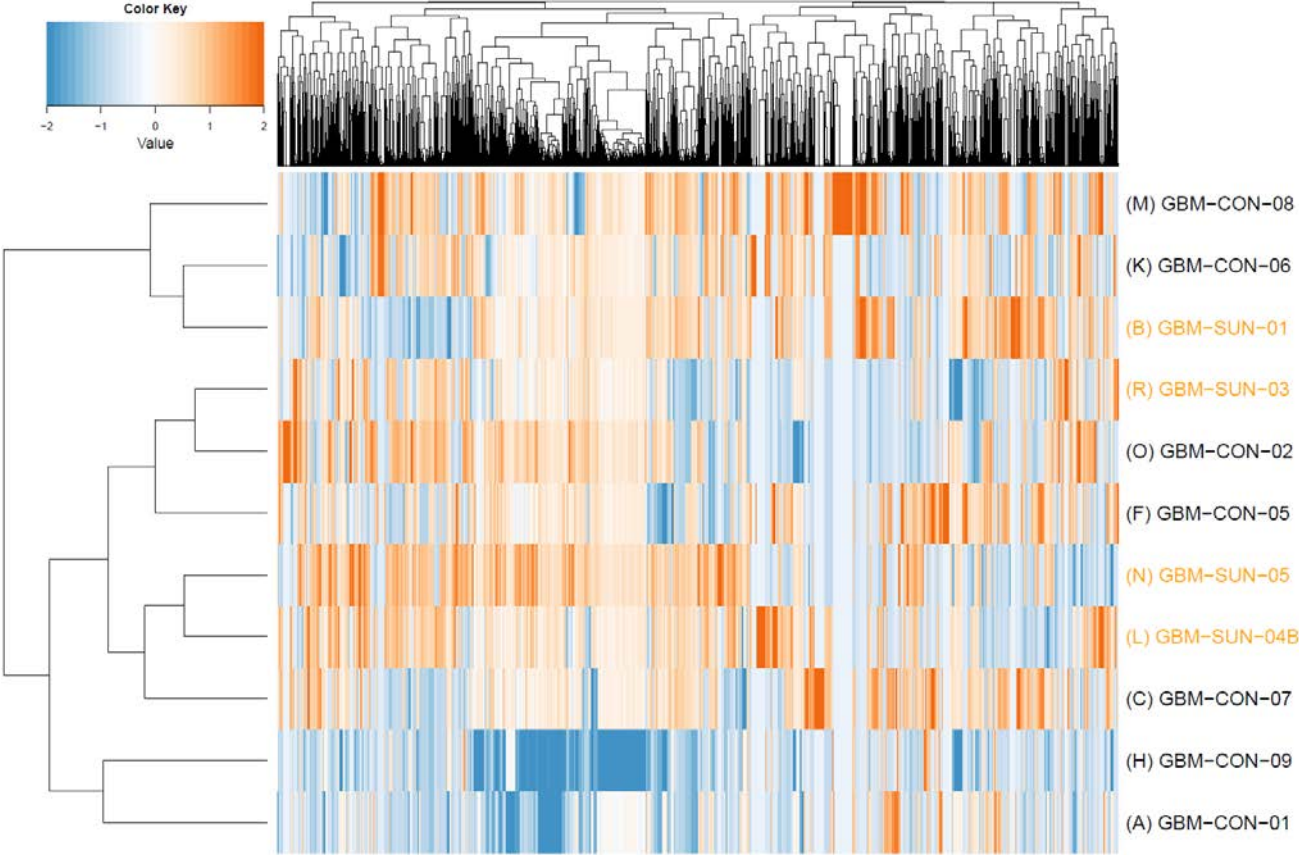

**Supplementary Figure 1.** Unsupervised hierarchical clustering of the pTyr-phosphoproteome could not separate between sunitinib-treated (SUN) and control tumor (CON) samples. The heatmap shows the relative phosphopeptide intensities (z-score) based on log10-transformed values (orange: high abundance, blue: low abundance).
