# Supplementary figures and images for: Tumor Drug Concentration and Phosphoproteomic Profiles After Two Weeks of Treatment With Sunitinib in Patients with Newly Diagnosed Glioblastoma
Source: PubMed Central journal article supplement — Clin Cancer Res. 2022 Feb 11;28(8):1595–602. doi: 10.1158/1078-0432.CCR-21-1933 (PMC9365363; doi:10.1158/1078-0432.ccr-21-1933), 2022-02-11

Supplementary Figure 1 Study design

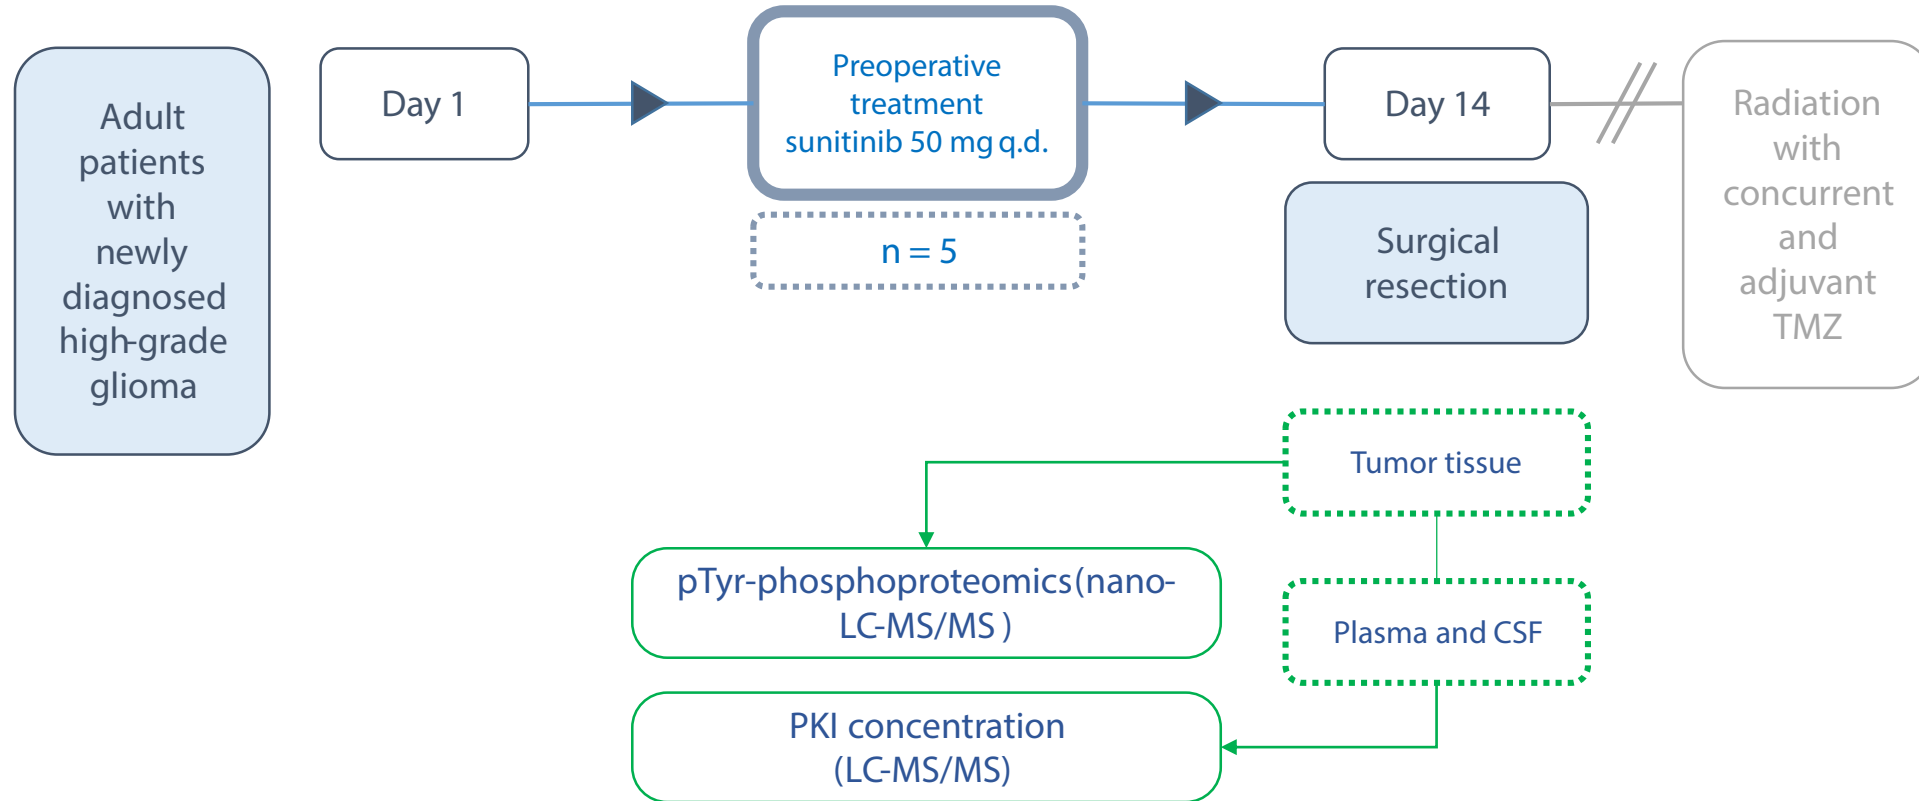

Supplement: ccr-21-1933_supplementary_data_suppfigs1.pdf [file ccr-21-1933_supplementary_data_suppfigs1.pdf]

# Supplementary Figure 3b 'Outlier' kinase activity boxplots

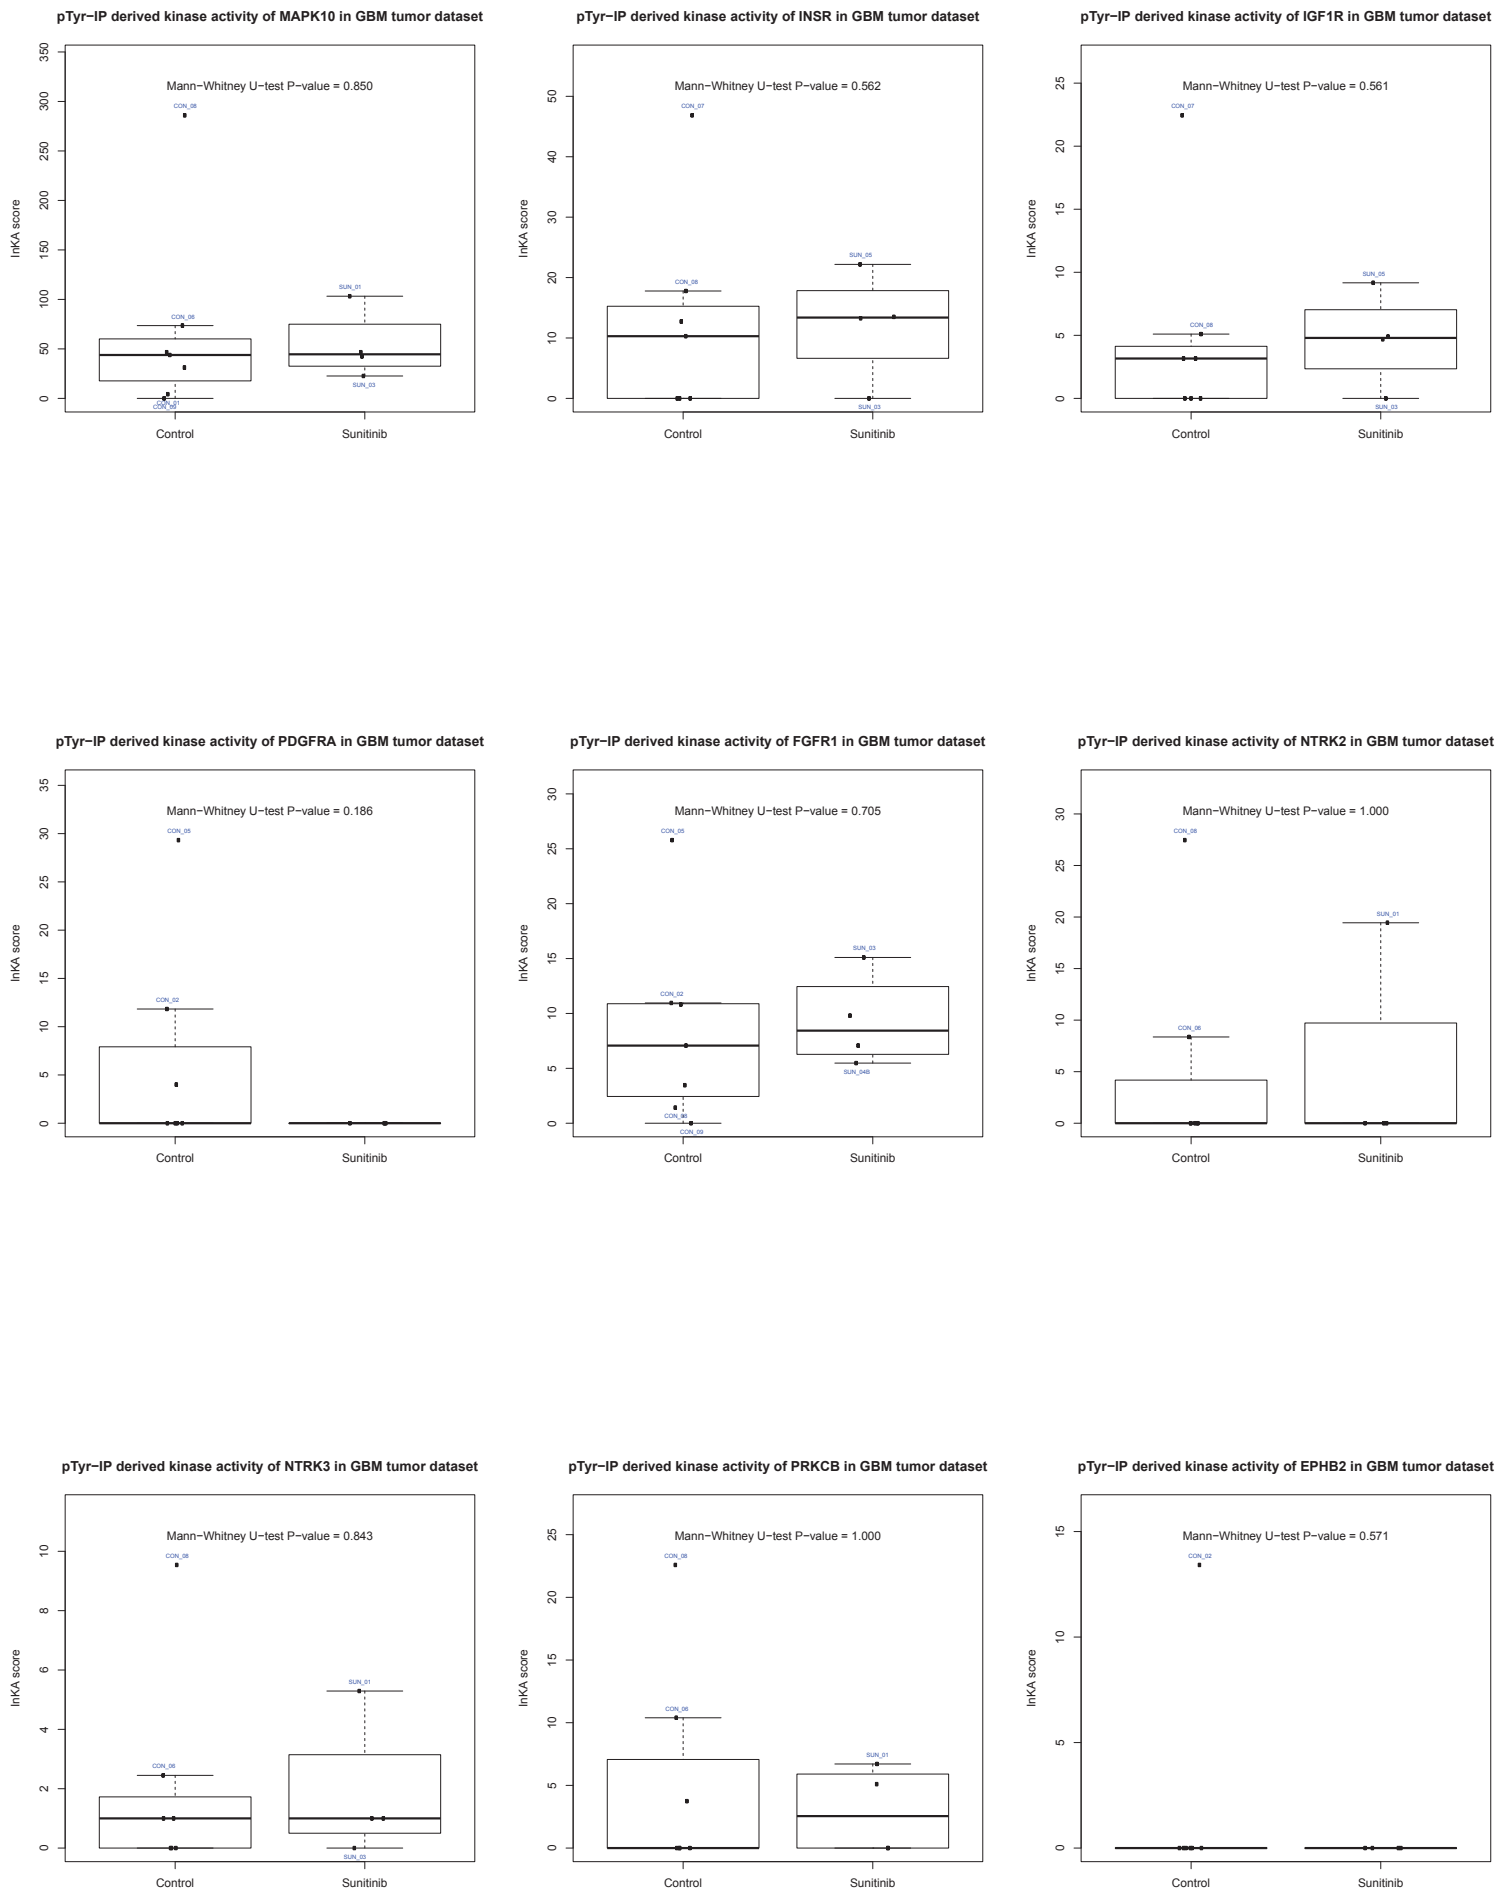

Supplement: ccr-21-1933_supplementary_data_suppfigs3b.pdf [file ccr-21-1933_supplementary_data_suppfigs3b.pdf]

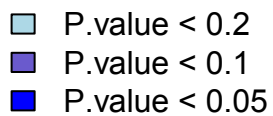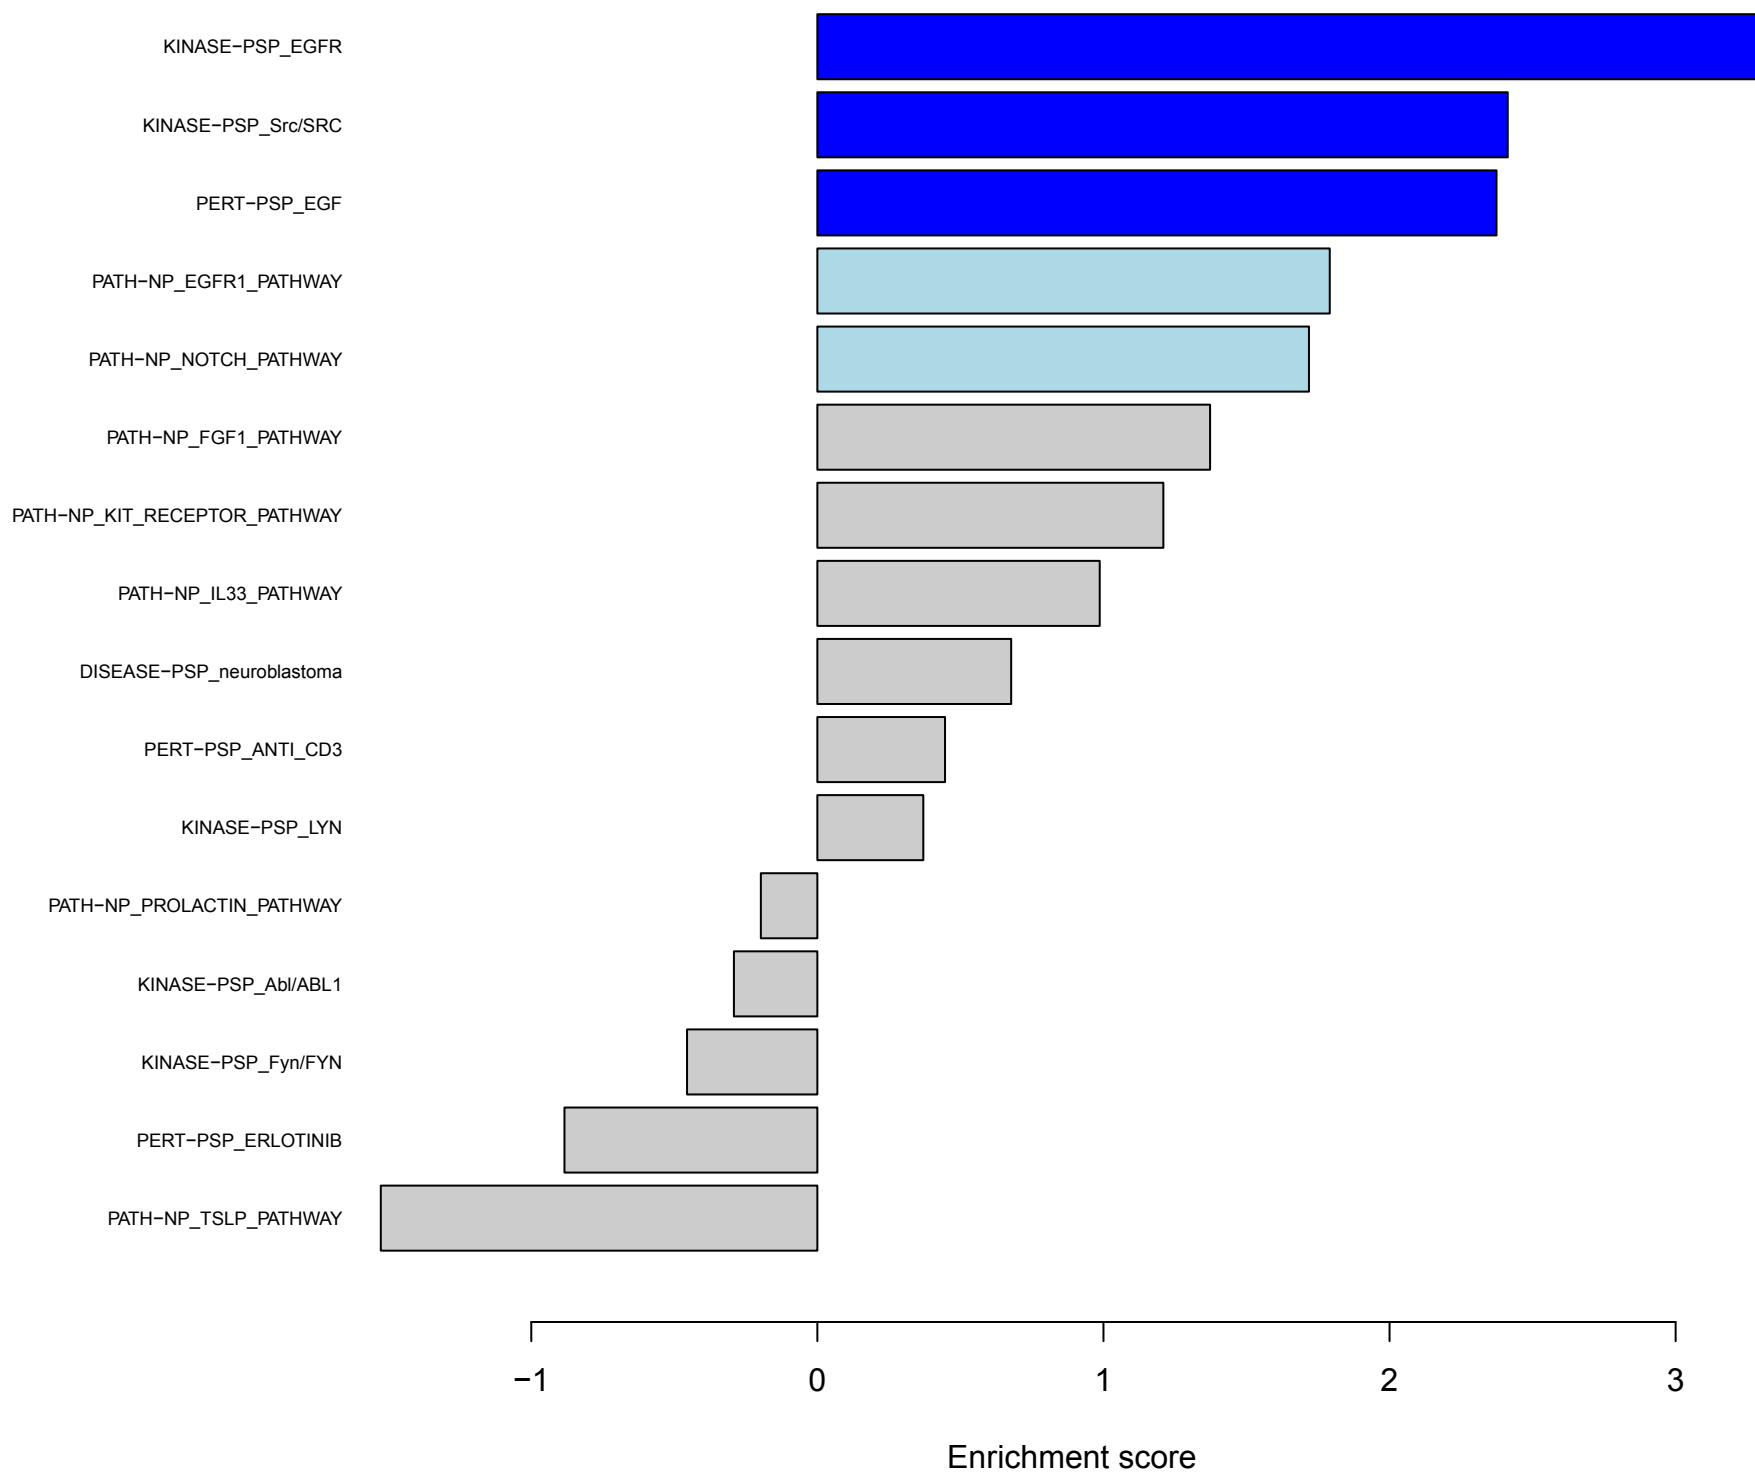

Supplement: ccr-21-1933_supplementary_data_suppfigs4.pdf [file ccr-21-1933_supplementary_data_suppfigs4.pdf]
